# Supplementary material for: Trends in hepatocellular carcinoma stage by racial/ethnic group in the United States, 1992–2019
Source: PubMed Central journal article supplement — JHEP Rep. 2023 Jul 29;5(11):100868. doi: 10.1016/j.jhepr.2023.100868 (PMC10550401; doi:10.1016/j.jhepr.2023.100868), 2023-07-29
Supplement: mmc1.pdf [file mmc1.pdf]

# Trends in hepatocellular carcinoma stage by racial-ethnic group in the United States, 1992-2019

Christian S. Alvarez, Jennifer Ruhl, Gretchen Flynn, Barry I. Graubard, Katherine A.  
McGlynn

|               |   |
|---------------|---|
| Fig. S1.....  | 2 |
| Table S1..... | 3 |

**Supplementary Figure 1: Stage 1 vs Stage 4 HCC Trends By Racial-Ethnic Group in the U.S., 1992-2019**

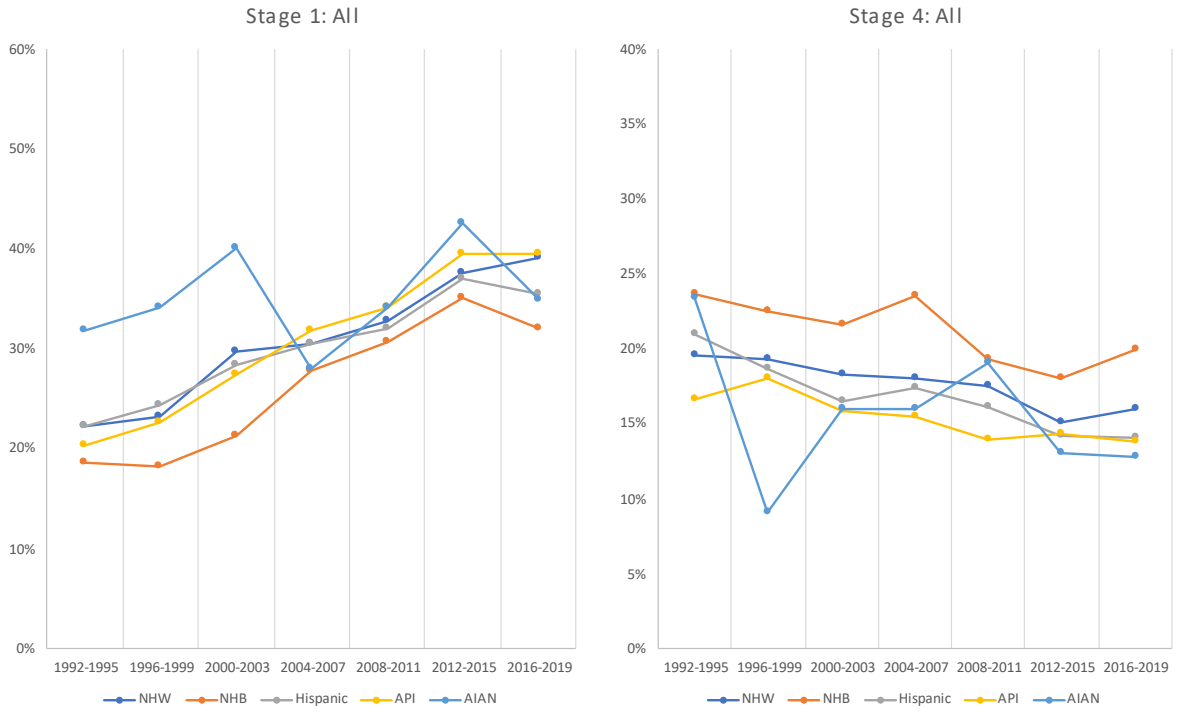

Abbreviations: NonHispanic White (NHW); Non-Hispanic Black (NHB); Asian/Pacific Islander (API); American Indian/Alaska Native (AI/AN)

**Supplementary Table 1.** Age-standardized rates and 95% CIs of hepatocellular carcinomas in the U.S.: SEER 12 registries, 1992 through 2019

|                               | 1992  |       |               | 2019  |       |               | Joinpoints |      |      | APC (%) Trends <sup>a</sup> |       |       |       | AAPC  |              |
|-------------------------------|-------|-------|---------------|-------|-------|---------------|------------|------|------|-----------------------------|-------|-------|-------|-------|--------------|
|                               | Cases | ASR   | 95%CI         | Cases | ASR   | 95%CI         | 1          | 2    | 3    | 1                           | 2     | 3     | 4     | %     | 95% CI       |
| All                           | 849   | 3.08  | (2.87, 3.29)  | 2,972 | 6.04  | (5.82, 6.26)  | 2009       | 2015 | -    | 4.7*                        | 0.9   | -4.6* | -     | 2.4*  | (1.9, 2.9)   |
| Sex                           |       |       |               |       |       |               |            |      |      |                             |       |       |       |       |              |
| Men                           | 614   | 5.03  | (4.63, 5.45)  | 2,190 | 9.53  | (9.12, 9.95)  | 2011       | 2016 | -    | 4.4*                        | -1.0  | -5.4* | -     | 2.3*  | (1.7, 2.8)   |
| Women                         | 235   | 1.53  | (1.34, 1.74)  | 782   | 3.00  | (2.79, 3.23)  | 2013       | -    | -    | 3.6*                        | -2.8* | -     | -     | 2.1*  | (1.5, 2.8)   |
| Race-ethnicity <sup>b</sup>   |       |       |               |       |       |               |            |      |      |                             |       |       |       |       |              |
| Non-Hispanic White            | 389   | 1.89  | (1.71, 2.09)  | 1,276 | 4.26  | (4.02, 4.51)  | 2004       | 2008 | 2013 | 4.2*                        | 7.4*  | 3.4*  | -2.7* | 2.9*  | (2.1, 3.7)   |
| Non-Hispanic Black            | 69    | 3.81  | (2.94, 4.84)  | 294   | 7.31  | (6.47, 8.22)  | 2009       | -    | -    | 5.4*                        | -1.0  | -     | -     | 3.0*  | (2.1, 3.9)   |
| Hispanic                      | 124   | 4.87  | (4.01, 5.85)  | 721   | 9.33  | (8.64, 10.07) | 2012       | -    | -    | 4.1*                        | -2.9* | -     | -     | 2.3*  | (1.7, 2.8)   |
| Asian/Pacific Islander        | 260   | 10.94 | (9.60, 12.41) | 601   | 8.18  | (7.53, 8.87)  | 2010       | -    | -    | -                           | 1.0*  | -4.6* | -     | -0.9* | (-1.5, -0.3) |
| American Indian/Alaska Native | 6     | 3.26  | (1.03, 7.25)  | 61    | 12.12 | (9.17, 15.72) | -          | -    | -    | 4.0*                        | -     | -     | -     | 4.0*  | (2.6, 5.3)   |

Abbreviations: 95% CI, 95% confidence interval; AAPC, average annual percent change; APC, annual percent change; ASR, age-standardized incidence rate; SEER, Surveillance, Epidemiology and End Results.

<sup>a</sup>Asterisk denotes that the trend was statistically different from zero at alpha 0.05 level.

<sup>b</sup>Cases may not add up to total due to unknown race-ethnicity categories.
