# Supplementary material for: Trends in hepatocellular carcinoma stage by racial/ethnic group in the United States, 1992–2019
Source: PubMed Central journal article supplement — JHEP Rep. 2023 Jul 29;5(11):100868. doi: 10.1016/j.jhepr.2023.100868 (PMC10550401; doi:10.1016/j.jhepr.2023.100868), 2023-07-29
Supplement: mmc4.pdf [file mmc4.pdf]

# Trends in hepatocellular carcinoma stage by racial/ethnic group in the United States, 1992–2019

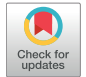

Christian S. Alvarez,<sup>1</sup> Jennifer Ruhl,<sup>2</sup> Gretchen Flynn,<sup>3</sup> Barry I. Graubard,<sup>1</sup> Katherine A. McGlynn<sup>1,\*</sup>

<sup>1</sup>Division of Cancer Epidemiology and Genetics, National Cancer Institute, Rockville, MD, USA; <sup>2</sup>Division of Cancer Control and Population Sciences, NCI, Rockville, MD, USA; <sup>3</sup>Information Management Services, Calverton, MD, USA

JHEP Reports 2023. <https://doi.org/10.1016/j.jhepr.2023.100868>

**Background & Aims:** Although incidence rates of hepatocellular carcinoma (HCC) began to decline in the United States in the past decade, disparities in rates among racial/ethnic groups have persisted. Whether disparities in stage at diagnosis have remained over time, however, is unclear.

**Methods:** National Cancer Institute's Surveillance, Epidemiology and End Results (SEER) program has created a new staging-over-time variable that facilitates the examination of trends in HCC stage. Thus, the proportions of HCCs diagnosed by stage between 1992 and 2019 were examined among non-Hispanic White, non-Hispanic Black (NHB), Hispanic, Asian/Pacific Islander, and American Indian/Alaska Native (AI/AN) individuals. HCC incidence between 1992 and 2019 was also analysed using Joinpoint regression.

**Results:** Between 1992 and 2019, the proportion of stage 1 HCCs increased and the proportion of stage 4 HCCs decreased among non-Hispanic White, NHB, Hispanic, and Asian/Pacific Islander individuals. Among AI/AN persons, the proportion of stage 1 tumours remained stable, and the proportion of stage 4 tumours declined. In the most recent time period, NHB individuals had the lowest proportions of stage 1 HCCs (32%) and the highest proportion of stage 4 HCCs (20%) of any group. Joinpoint analysis found that HCC incidence began to decline by 2013 among all groups except AI/AN individuals, the only group that had an increase in incidence.

**Conclusions:** Despite generally favourable trends in HCC stage and incidence rates, disparities remain. NHB persons continue to have less favourable stages at diagnosis, and incidence rates continue to increase among AI/AN persons.

**Impact and implications:** HCC incidence rates among most United States racial/ethnic groups began to decline in recent years, but whether stage at diagnosis also improved was unclear. As a result, a new SEER stage variable was used to examine stage trends by race/ethnicity. Although the finding of generally favourable trends in stage as well as incidence is encouraging, continuity disparities in both stage and incidence require serious attention.

© 2023 The Author(s). Published by Elsevier B.V. on behalf of European Association for the Study of the Liver (EASL). This is an open access article under the CC BY-NC-ND license (<http://creativecommons.org/licenses/by-nc-nd/4.0/>).

## Introduction

Hepatocellular carcinoma (HCC) is characterised by sex and racial/ethnic disparities in the USA.<sup>1</sup> Our previous reports from the Surveillance, Epidemiology and End Results (SEER) cancer registries have shown that HCC rates began to decline among both sexes and most racial/ethnic groups in the past decade.<sup>2,3</sup> However, differences in rates among groups have continued to persist.<sup>2</sup> In addition, differences in HCC stage at diagnosis have been reported by some studies.<sup>4</sup> HCC staging criteria have changed over time, however, thus suggesting that previous temporal analyses might have been misleading. The development of new SEER staging-over-time variables has enabled us to

examine HCC stage by race/ethnicity and sex between 1992 and 2019 in the United States population.

## Materials and methods

Data on HCC incidence, including the new staging-over-time variable, were retrieved from the SEER-12 database for 1992–2019.<sup>5</sup> To derive the new variable, SEER harmonised T, N, and M definitions with data on histology, tumour size, regional nodes positivity, summary stage, and other items. HCCs were identified using the International Classification of Disease for Oncology, third edition, topography code C22 and morphology codes 8170–8174 (code 8175 was not eligible for TNM staging per the American Joint Committee on Cancer eighth edition<sup>6</sup> guidelines). Single HCC counts were grouped into seven 4-year periods. Proportions of cases diagnosed at stages 1 through 4, and an unknown stage, were calculated by sex and race/ethnicity (non-Hispanic White [NHW], non-Hispanic Black [NHB], Hispanic, Asian/Pacific Islander [API], and American Indian/Alaska Native [AI/AN] [purchased/referred care delivery area only]). 95%

Keywords: Carcinomas; Hepatocellular; Neoplasm staging; Trends; US population; Race/ethnicity.

Received 12 June 2023; received in revised form 11 July 2023; accepted 12 July 2023; available online 29 July 2023

\* Corresponding author. Address: National Cancer Institute, 9609 Medical Center Dr, Room 6E466, Rockville, MD 20850, USA. Tel.: +1-240-276-7297.

E-mail address: [mcglynnk@mail.nih.gov](mailto:mcglynnk@mail.nih.gov) (K.A. McGlynn).

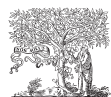

ELSEVIER

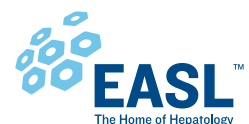

**Table 1. Stage-specific proportions and 95% CIs of hepatocellular carcinomas overall and by sex and race/ethnicity in the USA, SEER-12 registries with specialised staging over time fields, 1992–2019.**

| All                           |           | Stage 1 |    |           | Stage 2 |    |           | Stage 3 |    |           | Stage 4 |    |           | Stage unknown |    |           |
|-------------------------------|-----------|---------|----|-----------|---------|----|-----------|---------|----|-----------|---------|----|-----------|---------------|----|-----------|
|                               |           | Cases   | %  | 95% CI    | Cases         | %  | 95% CI    |
| Non-Hispanic White            | 1992–1995 | 381     | 22 | (20% 24%) | 228     | 13 | (12% 15%) | 248     | 14 | (13% 16%) | 336     | 20 | (18% 21%) | 520           | 30 | (28% 33%) |
|                               | 1996–1999 | 506     | 23 | (21% 25%) | 385     | 18 | (16% 19%) | 328     | 15 | (14% 17%) | 420     | 19 | (18% 21%) | 537           | 25 | (23% 26%) |
|                               | 2000–2003 | 756     | 30 | (28% 31%) | 499     | 20 | (18% 21%) | 430     | 17 | (15% 18%) | 465     | 18 | (17% 20%) | 396           | 16 | (14% 17%) |
|                               | 2004–2007 | 1,033   | 31 | (29% 32%) | 733     | 22 | (20% 23%) | 545     | 16 | (15% 17%) | 609     | 18 | (17% 19%) | 459           | 14 | (12% 15%) |
|                               | 2008–2011 | 1,500   | 33 | (31% 34%) | 1,015   | 22 | (21% 23%) | 835     | 18 | (17% 19%) | 803     | 18 | (16% 19%) | 427           | 9  | (8% 10%)  |
|                               | 2012–2015 | 2,052   | 38 | (36% 39%) | 1,157   | 21 | (20% 22%) | 973     | 18 | (17% 19%) | 825     | 15 | (14% 16%) | 461           | 8  | (8% 9%)   |
|                               | 2016–2019 | 2,067   | 39 | (38% 41%) | 950     | 18 | (17% 19%) | 917     | 17 | (16% 18%) | 843     | 16 | (15% 17%) | 495           | 9  | (9% 10%)  |
| Non-Hispanic Black            | 1992–1995 | 57      | 19 | (14% 23%) | 40      | 13 | (9% 17%)  | 55      | 18 | (14% 22%) | 72      | 24 | (19% 28%) | 81            | 27 | (22% 32%) |
|                               | 1996–1999 | 80      | 18 | (15% 22%) | 93      | 21 | (17% 25%) | 79      | 18 | (14% 22%) | 99      | 23 | (19% 26%) | 89            | 20 | (16% 24%) |
|                               | 2000–2003 | 124     | 21 | (18% 25%) | 119     | 21 | (17% 24%) | 119     | 21 | (17% 24%) | 125     | 22 | (18% 25%) | 92            | 16 | (13% 19%) |
|                               | 2004–2007 | 247     | 28 | (25% 31%) | 177     | 20 | (17% 23%) | 181     | 20 | (18% 23%) | 208     | 23 | (21% 26%) | 73            | 8  | (6% 10%)  |
|                               | 2008–2011 | 345     | 31 | (28% 33%) | 225     | 20 | (18% 22%) | 232     | 21 | (18% 23%) | 218     | 19 | (17% 22%) | 105           | 9  | (8% 11%)  |
|                               | 2012–2015 | 488     | 35 | (33% 38%) | 263     | 19 | (17% 21%) | 272     | 20 | (17% 22%) | 251     | 18 | (16% 20%) | 116           | 8  | (7% 10%)  |
|                               | 2016–2019 | 439     | 32 | (30% 35%) | 224     | 16 | (14% 18%) | 295     | 22 | (19% 24%) | 273     | 20 | (18% 22%) | 136           | 10 | (8% 12%)  |
| Hispanic                      | 1992–1995 | 120     | 22 | (19% 26%) | 91      | 17 | (14% 20%) | 71      | 13 | (10% 16%) | 113     | 21 | (17% 24%) | 145           | 27 | (23% 31%) |
|                               | 1996–1999 | 206     | 24 | (22% 27%) | 152     | 18 | (15% 21%) | 122     | 14 | (12% 17%) | 157     | 19 | (16% 21%) | 205           | 24 | (21% 27%) |
|                               | 2000–2003 | 333     | 28 | (26% 31%) | 256     | 22 | (19% 24%) | 185     | 16 | (14% 18%) | 194     | 17 | (14% 19%) | 207           | 18 | (15% 20%) |
|                               | 2004–2007 | 519     | 31 | (28% 33%) | 360     | 21 | (19% 23%) | 308     | 18 | (16% 20%) | 297     | 17 | (16% 19%) | 217           | 13 | (11% 14%) |
|                               | 2008–2011 | 728     | 32 | (30% 34%) | 517     | 23 | (21% 24%) | 373     | 16 | (15% 18%) | 368     | 16 | (15% 18%) | 287           | 13 | (11% 14%) |
|                               | 2012–2015 | 1,051   | 37 | (35% 39%) | 573     | 20 | (19% 22%) | 465     | 16 | (15% 18%) | 406     | 14 | (13% 16%) | 349           | 12 | (11% 13%) |
|                               | 2016–2019 | 1,038   | 36 | (34% 37%) | 568     | 19 | (18% 21%) | 473     | 16 | (15% 18%) | 412     | 14 | (13% 15%) | 427           | 15 | (13% 16%) |
| Asian/Pacific Islander        | 1992–1995 | 229     | 20 | (18% 23%) | 192     | 17 | (15% 19%) | 225     | 20 | (18% 22%) | 188     | 17 | (14% 19%) | 295           | 26 | (24% 29%) |
|                               | 1996–1999 | 342     | 23 | (21% 25%) | 302     | 20 | (18% 22%) | 324     | 22 | (19% 24%) | 272     | 18 | (16% 20%) | 266           | 18 | (16% 20%) |
|                               | 2000–2003 | 504     | 27 | (25% 29%) | 395     | 22 | (20% 23%) | 404     | 22 | (20% 24%) | 292     | 16 | (14% 18%) | 242           | 13 | (12% 15%) |
|                               | 2004–2007 | 720     | 32 | (30% 34%) | 483     | 21 | (20% 23%) | 480     | 21 | (20% 23%) | 350     | 16 | (14% 17%) | 221           | 10 | (9% 11%)  |
|                               | 2008–2011 | 870     | 34 | (32% 36%) | 509     | 20 | (18% 22%) | 511     | 20 | (19% 22%) | 356     | 14 | (13% 15%) | 297           | 12 | (10% 13%) |
|                               | 2012–2015 | 1,057   | 40 | (38% 41%) | 459     | 17 | (16% 19%) | 526     | 20 | (18% 21%) | 383     | 14 | (13% 16%) | 250           | 9  | (8% 10%)  |
|                               | 2016–2019 | 993     | 39 | (38% 41%) | 397     | 16 | (14% 17%) | 525     | 21 | (19% 22%) | 348     | 14 | (12% 15%) | 251           | 10 | (9% 11%)  |
| American Indian/Alaska Native | 1992–1995 | 15      | 32 | (19% 45%) | 6       | 13 | (3% 22%)  | 9       | 19 | (8% 30%)  | 11      | 23 | (11% 36%) | 6             | 13 | (3% 22%)  |
|                               | 1996–1999 | 15      | 34 | (20% 48%) | 10      | 23 | (10% 35%) | 6       | 14 | (3% 24%)  | ≤5      | 9  | (1% 18%)  | 9             | 20 | (9% 32%)  |
|                               | 2000–2003 | 30      | 40 | (29% 51%) | 9       | 12 | (5% 19%)  | 16      | 21 | (12% 31%) | 12      | 16 | (8% 24%)  | 8             | 11 | (4% 18%)  |
|                               | 2004–2007 | 35      | 28 | (20% 36%) | 33      | 26 | (19% 34%) | 18      | 14 | (8% 21%)  | 20      | 16 | (10% 22%) | 19            | 15 | (9% 21%)  |
|                               | 2008–2011 | 63      | 34 | (27% 41%) | 30      | 16 | (11% 22%) | 30      | 16 | (11% 22%) | 35      | 19 | (13% 25%) | 26            | 14 | (9% 19%)  |
|                               | 2012–2015 | 94      | 43 | (36% 49%) | 40      | 18 | (13% 23%) | 39      | 18 | (13% 23%) | 29      | 13 | (9% 18%)  | 19            | 9  | (5% 12%)  |
|                               | 2016–2019 | 90      | 35 | (29% 41%) | 56      | 22 | (17% 27%) | 31      | 12 | (8% 16%)  | 33      | 13 | (9% 17%)  | 47            | 18 | (14% 23%) |
| <b>Men</b>                    |           |         |    |           |         |    |           |         |    |           |         |    |           |               |    |           |
| Non-Hispanic White            | 1992–1995 | 278     | 22 | (20% 25%) | 169     | 14 | (12% 15%) | 173     | 14 | (12% 16%) | 254     | 20 | (18% 23%) | 376           | 30 | (28% 33%) |
|                               | 1996–1999 | 362     | 23 | (21% 25%) | 285     | 18 | (16% 20%) | 236     | 15 | (13% 17%) | 328     | 21 | (19% 23%) | 386           | 24 | (22% 26%) |
|                               | 2000–2003 | 547     | 29 | (27% 31%) | 388     | 20 | (19% 22%) | 327     | 17 | (15% 19%) | 355     | 19 | (17% 20%) | 286           | 15 | (13% 17%) |
|                               | 2004–2007 | 786     | 30 | (28% 32%) | 572     | 22 | (20% 23%) | 432     | 16 | (15% 18%) | 486     | 18 | (17% 20%) | 356           | 14 | (12% 15%) |
|                               | 2008–2011 | 1,157   | 32 | (30% 33%) | 797     | 22 | (21% 23%) | 666     | 18 | (17% 20%) | 653     | 18 | (17% 19%) | 347           | 10 | (9% 11%)  |
|                               | 2012–2015 | 1,575   | 36 | (35% 38%) | 933     | 21 | (20% 23%) | 806     | 19 | (17% 20%) | 662     | 15 | (14% 16%) | 365           | 8  | (8% 9%)   |
|                               | 2016–2019 | 1,558   | 38 | (36% 39%) | 753     | 18 | (17% 19%) | 728     | 18 | (17% 19%) | 690     | 17 | (16% 18%) | 388           | 9  | (9% 10%)  |
| Non-Hispanic Black            | 1992–1995 | 39      | 17 | (13% 22%) | 33      | 15 | (13% 17%) | 46      | 21 | (18% 23%) | 48      | 22 | (19% 24%) | 57            | 26 | (23% 28%) |
|                               | 1996–1999 | 50      | 16 | (12% 20%) | 66      | 21 | (19% 23%) | 64      | 20 | (18% 22%) | 70      | 22 | (20% 24%) | 66            | 21 | (19% 23%) |
|                               | 2000–2003 | 85      | 19 | (15% 23%) | 93      | 21 | (19% 22%) | 91      | 20 | (18% 22%) | 105     | 23 | (21% 25%) | 76            | 17 | (15% 19%) |
|                               | 2004–2007 | 184     | 27 | (24% 30%) | 136     | 20 | (18% 21%) | 137     | 20 | (18% 21%) | 170     | 25 | (23% 26%) | 59            | 9  | (8% 10%)  |
|                               | 2008–2011 | 255     | 29 | (26% 32%) | 187     | 21 | (20% 23%) | 187     | 21 | (20% 23%) | 182     | 21 | (19% 22%) | 70            | 8  | (7% 9%)   |
|                               | 2012–2015 | 358     | 33 | (31% 36%) | 188     | 19 | (17% 20%) | 217     | 20 | (19% 21%) | 206     | 19 | (18% 20%) | 91            | 9  | (8% 9%)   |
|                               | 2016–2019 | 312     | 31 | (28% 33%) | 167     | 16 | (15% 18%) | 216     | 21 | (20% 22%) | 211     | 21 | (19% 22%) | 114           | 11 | (10% 12%) |

(continued on next page)

Table 1 (continued)

|                               |                    | Stage 1   |           |           | Stage 2   |           |           | Stage 3   |           |           | Stage 4   |           |           | Stage unknown |           |           |           |
|-------------------------------|--------------------|-----------|-----------|-----------|-----------|-----------|-----------|-----------|-----------|-----------|-----------|-----------|-----------|---------------|-----------|-----------|-----------|
|                               |                    | Cases     | %         | 95% CI    | Cases         | %         | 95% CI    |           |
| Hispanic                      | 1992–1995          | 75        | 17        | (15% 23%) | 68        | 17        | (14% 20%) | 56        | 14        | (12% 16%) | 89        | 22        | (19% 25%) | 110           | 28        | (25% 31%) |           |
|                               | 1996–1999          | 134       | 16        | (19% 25%) | 120       | 20        | (17% 22%) | 84        | 14        | (12% 16%) | 123       | 20        | (18% 23%) | 148           | 24        | (22% 27%) |           |
|                               | 2000–2003          | 233       | 19        | (24% 30%) | 187       | 22        | (19% 24%) | 148       | 17        | (15% 19%) | 140       | 16        | (14% 18%) | 158           | 18        | (16% 20%) |           |
|                               | 2004–2007          | 360       | 27        | (26% 30%) | 288       | 22        | (20% 24%) | 236       | 18        | (16% 20%) | 242       | 19        | (17% 21%) | 158           | 12        | (11% 14%) |           |
|                               | 2008–2011          | 536       | 29        | (29% 33%) | 388       | 23        | (21% 24%) | 299       | 17        | (16% 19%) | 291       | 17        | (15% 19%) | 209           | 12        | (11% 14%) |           |
|                               | 2012–2015          | 733       | 33        | (33% 37%) | 423       | 20        | (18% 22%) | 363       | 17        | (16% 19%) | 319       | 15        | (14% 17%) | 265           | 13        | (11% 14%) |           |
| Asian/Pacific Islander        | 2016–2019          | 702       | 31        | (31% 35%) | 416       | 19        | (18% 21%) | 367       | 17        | (15% 19%) | 323       | 15        | (13% 17%) | 330           | 15        | (14% 17%) |           |
|                               | 1992–1995          | 163       | 20        | (17% 23%) | 139       | 17        | (3% 31%)  | 164       | 20        | (5% 35%)  | 134       | 16        | (2% 30%)  | 214           | 26        | (10% 43%) |           |
|                               | 1996–1999          | 251       | 23        | (21% 26%) | 213       | 20        | (4% 35%)  | 240       | 22        | (6% 38%)  | 203       | 19        | (3% 34%)  | 183           | 17        | (2% 31%)  |           |
|                               | 2000–2003          | 319       | 24        | (22% 27%) | 287       | 22        | (11% 33%) | 305       | 23        | (12% 35%) | 229       | 18        | (7% 28%)  | 168           | 13        | (4% 22%)  |           |
|                               | 2004–2007          | 495       | 30        | (28% 33%) | 351       | 22        | (13% 30%) | 373       | 23        | (14% 32%) | 269       | 17        | (9% 24%)  | 142           | 9         | (3% 15%)  |           |
|                               | 2008–2011          | 587       | 32        | (30% 34%) | 359       | 20        | (13% 27%) | 385       | 21        | (14% 28%) | 285       | 16        | (9% 22%)  | 201           | 11        | (6% 16%)  |           |
| American Indian/Alaska Native | 2012–2015          | 714       | 37        | (35% 39%) | 343       | 18        | (12% 24%) | 398       | 21        | (14% 27%) | 313       | 16        | (10% 22%) | 158           | 8         | (4% 13%)  |           |
|                               | 2016–2019          | 689       | 38        | (35% 40%) | 298       | 16        | (11% 22%) | 395       | 22        | (16% 28%) | 267       | 15        | (9% 20%)  | 183           | 10        | (6% 14%)  |           |
|                               | 1992–1995          | 8         | 30        | (12% 47%) | ≤5        | 19        | (13% 24%) | ≤5        | 15        | (10% 19%) | 8         | 30        | (24% 36%) | ≤5            | 7         | (4% 11%)  |           |
|                               | 1996–1999          | 8         | 32        | (14% 50%) | 6         | 24        | (19% 29%) | ≤5        | 12        | (8% 16%)  | ≤5        | 8         | (5% 11%)  | 6             | 24        | (19% 29%) |           |
|                               | 2000–2003          | 23        | 43        | (30% 57%) | ≤5        | 9         | (7% 12%)  | 13        | 25        | (21% 29%) | 7         | 13        | (10% 16%) | ≤5            | 9         | (7% 12%)  |           |
|                               | 2004–2007          | 24        | 28        | (18% 37%) | 23        | 26        | (23% 30%) | 12        | 14        | (11% 16%) | 16        | 18        | (15% 21%) | 12            | 14        | (11% 16%) |           |
| <b>Women</b>                  | 2008–2011          | 50        | 38        | (30% 47%) | 19        | 15        | (12% 17%) | 18        | 14        | (12% 16%) | 29        | 22        | (20% 25%) | 14            | 11        | (9% 13%)  |           |
|                               | 2012–2015          | 56        | 37        | (30% 45%) | 29        | 19        | (17% 22%) | 31        | 21        | (18% 23%) | 24        | 16        | (14% 18%) | 10            | 7         | (5% 8%)   |           |
|                               | 2016–2019          | 55        | 31        | (24% 37%) | 44        | 25        | (22% 27%) | 23        | 13        | (11% 15%) | 25        | 14        | (12% 16%) | 32            | 18        | (16% 20%) |           |
|                               | Non-Hispanic White | 1992–1995 | 103       | 22        | (18% 26%) | 59        | 13        | (10% 16%) | 75        | 16        | (13% 20%) | 82        | 18        | (14% 21%)     | 144       | 31        | (27% 35%) |
|                               | 1996–1999          | 144       | 25        | (21% 28%) | 100       | 17        | (14% 20%) | 92        | 16        | (13% 19%) | 92        | 16        | (13% 19%) | 151           | 26        | (23% 30%) |           |
|                               | 2000–2003          | 209       | 33        | (29% 36%) | 111       | 17        | (14% 20%) | 103       | 16        | (13% 19%) | 110       | 17        | (14% 20%) | 110           | 17        | (14% 20%) |           |
| 2004–2007                     | 247                | 33        | (30% 36%) | 161       | 22        | (19% 25%) | 113       | 15        | (13% 18%) | 123       | 16        | (14% 19%) | 103       | 14            | (11% 16%) |           |           |
| 2008–2011                     | 343                | 36        | (33% 39%) | 218       | 23        | (20% 25%) | 169       | 18        | (15% 20%) | 150       | 16        | (13% 18%) | 80        | 8             | (7% 10%)  |           |           |
| 2012–2015                     | 477                | 42        | (39% 45%) | 224       | 20        | (18% 22%) | 167       | 15        | (13% 17%) | 163       | 14        | (12% 17%) | 96        | 9             | (7% 10%)  |           |           |
| 2016–2019                     | 509                | 44        | (41% 47%) | 197       | 17        | (15% 19%) | 189       | 16        | (14% 18%) | 153       | 13        | (11% 15%) | 107       | 9             | (8% 11%)  |           |           |
| Non-Hispanic Black            | 1992–1995          | 18        | 22        | (13% 31%) | 7         | 9         | (2% 15%)  | 9         | 11        | (4% 18%)  | 24        | 29        | (19% 39%) | 24            | 29        | (19% 39%) |           |
|                               | 1996–1999          | 30        | 24        | (17% 32%) | 27        | 22        | (15% 29%) | 15        | 12        | (6% 18%)  | 29        | 23        | (16% 31%) | 23            | 19        | (12% 25%) |           |
|                               | 2000–2003          | 39        | 30        | (22% 38%) | 26        | 20        | (13% 27%) | 28        | 22        | (15% 29%) | 20        | 16        | (9% 22%)  | 16            | 12        | (7% 18%)  |           |
|                               | 2004–2007          | 63        | 32        | (25% 38%) | 41        | 21        | (15% 26%) | 44        | 22        | (16% 28%) | 38        | 19        | (14% 24%) | 14            | 7         | (3% 11%)  |           |
|                               | 2008–2011          | 90        | 37        | (31% 43%) | 38        | 16        | (11% 20%) | 45        | 18        | (14% 23%) | 36        | 15        | (10% 19%) | 35            | 14        | (10% 19%) |           |
|                               | 2012–2015          | 130       | 41        | (35% 46%) | 65        | 20        | (16% 25%) | 55        | 17        | (13% 21%) | 45        | 14        | (10% 18%) | 25            | 8         | (5% 11%)  |           |
| Hispanic                      | 2016–2019          | 127       | 37        | (32% 42%) | 57        | 16        | (13% 20%) | 79        | 23        | (18% 27%) | 62        | 18        | (14% 22%) | 22            | 6         | (4% 9%)   |           |
|                               | 1992–1995          | 45        | 32        | (24% 39%) | 23        | 16        | (10% 22%) | 15        | 11        | (6% 16%)  | 24        | 17        | (11% 23%) | 35            | 25        | (18% 32%) |           |
|                               | 1996–1999          | 72        | 31        | (25% 37%) | 32        | 14        | (9% 18%)  | 38        | 16        | (12% 21%) | 34        | 15        | (10% 19%) | 57            | 24        | (19% 30%) |           |
|                               | 2000–2003          | 100       | 32        | (27% 38%) | 69        | 22        | (18% 27%) | 37        | 12        | (8% 16%)  | 54        | 17        | (13% 22%) | 49            | 16        | (12% 20%) |           |
|                               | 2004–2007          | 159       | 38        | (33% 43%) | 72        | 17        | (14% 21%) | 72        | 17        | (14% 21%) | 55        | 13        | (10% 16%) | 59            | 14        | (11% 17%) |           |
|                               | 2008–2011          | 192       | 35        | (31% 39%) | 129       | 23        | (20% 27%) | 74        | 13        | (11% 16%) | 77        | 14        | (11% 17%) | 78            | 14        | (11% 17%) |           |
| Asian/Pacific Islander        | 2012–2015          | 318       | 43        | (39% 46%) | 150       | 20        | (17% 23%) | 102       | 14        | (11% 16%) | 87        | 12        | (9% 14%)  | 84            | 11        | (9% 14%)  |           |
|                               | 2016–2019          | 336       | 43        | (40% 47%) | 152       | 19        | (17% 22%) | 106       | 14        | (11% 16%) | 89        | 11        | (9% 14%)  | 97            | 12        | (10% 15%) |           |
|                               | 1992–1995          | 66        | 21        | (16% 25%) | 53        | 17        | (13% 21%) | 61        | 19        | (15% 24%) | 54        | 17        | (13% 21%) | ≤5            | 26        | (21% 31%) |           |
|                               | 1996–1999          | 91        | 22        | (18% 26%) | 89        | 21        | (17% 25%) | 84        | 20        | (16% 24%) | 69        | 17        | (13% 20%) | ≤5            | 20        | (16% 24%) |           |
|                               | 2000–2003          | 185       | 35        | (31% 39%) | 108       | 20        | (17% 24%) | 99        | 19        | (15% 22%) | 63        | 12        | (9% 15%)  | ≤5            | 14        | (11% 17%) |           |
|                               | 2004–2007          | 225       | 36        | (32% 40%) | 132       | 21        | (18% 24%) | 107       | 17        | (14% 20%) | 81        | 13        | (10% 16%) | 7             | 13        | (10% 15%) |           |
| 2008–2011                     | 283                | 39        | (35% 43%) | 150       | 21        | (18% 24%) | 126       | 17        | (15% 20%) | 71        | 10        | (8% 12%)  | 12        | 13            | (11% 16%) |           |           |
| 2012–2015                     | 343                | 46        | (42% 49%) | 116       | 15        | (13% 18%) | 128       | 17        | (14% 20%) | 70        | 9         | (7% 11%)  | 9         | 12            | (10% 15%) |           |           |
| 2016–2019                     | 304                | 45        | (41% 48%) | 99        | 15        | (12% 17%) | 130       | 19        | (16% 22%) | 81        | 12        | (9% 14%)  | 15        | 10            | (8% 12%)  |           |           |

(continued on next page)

Table 1 (continued)

|                               | Stage 1 |    |           | Stage 2 |    |           | Stage 3 |    |           | Stage 4 |    |          | Stage unknown |    |           |
|-------------------------------|---------|----|-----------|---------|----|-----------|---------|----|-----------|---------|----|----------|---------------|----|-----------|
|                               | Cases   | %  | 95% CI    | Cases   | %  | 95% CI    | Cases   | %  | 95% CI    | Cases   | %  | 95% CI   | Cases         | %  | 95% CI    |
| American Indian/Alaska Native | 7       | 35 | (14% 56%) | ≤5      | 5  | (0% 15%)  | ≤5      | 25 | (6% 44%)  | ≤5      | 15 | (0% 31%) | ≤5            | 20 | (2% 38%)  |
| 1992–1995                     | 7       | 37 | (15% 59%) | ≤5      | 21 | (3% 39%)  | ≤5      | 16 | (0% 32%)  | ≤5      | 11 | (0% 24%) | ≤5            | 16 | (0% 32%)  |
| 1996–1999                     | 7       | 32 | (12% 51%) | ≤5      | 18 | (2% 34%)  | ≤5      | 14 | (0% 28%)  | ≤5      | 23 | (5% 40%) | ≤5            | 14 | (0% 28%)  |
| 2000–2003                     | 11      | 29 | (15% 43%) | 10      | 26 | (12% 40%) | 6       | 16 | (4% 27%)  | ≤5      | 11 | (1% 20%) | 7             | 18 | (6% 31%)  |
| 2004–2007                     | 13      | 24 | (13% 35%) | 11      | 20 | (10% 31%) | 12      | 22 | (11% 33%) | 6       | 11 | (3% 19%) | 12            | 22 | (11% 33%) |
| 2008–2011                     | 38      | 54 | (42% 65%) | 11      | 15 | (7% 24%)  | 8       | 11 | (4% 19%)  | ≤5      | 7  | (1% 13%) | 9             | 13 | (5% 20%)  |
| 2012–2015                     | 35      | 45 | (34% 56%) | 12      | 15 | (7% 23%)  | 8       | 10 | (4% 17%)  | 8       | 10 | (4% 17%) | 15            | 19 | (10% 28%) |
| 2016–2019                     |         |    |           |         |    |           |         |    |           |         |    |          |               |    |           |

SEER, Surveillance, Epidemiology and End Results.

CI for each proportion were estimated using a binomial distribution. In addition, age-standardised incidence rates (ASRs) were calculated by race/ethnicity and sex for the entire study period, and trends in incidence were analysed using Joinpoint regression to estimate annual percent change (APC). All rates were adjusted using the direct method to the 2000 United States standard population (19 age groups).

### Results

Between 1992–1995 and 2016–2019, favourable trends in stage distribution were seen among NHW, NHB, Hispanic, and API persons (Table 1). Among these groups, the proportion of HCCs diagnosed at stage 1 increased, whereas the proportions diagnosed at stages 2 and 3 remained stable, and the proportions diagnosed at stage 4 decreased. The largest increase in stage 1, from 20% (95% CI 18–23%) to 39% (95% CI 38–41%), was observed among API persons. The greatest decrease in stage 4 HCCs, from 21 to 14%, was seen among Hispanic persons (Fig. S1). Despite the favourable trends among these groups, in the most recent time period, NHB persons had a lower proportion of stage 1 HCCs (32%) and a higher proportion of stage 4 HCCs (20%) than the other three groups.

HCC stage trends among AI/AN persons were less favourable than those among the other four groups. The proportion of stage 1 disease remained stable, whereas the proportion of stage 2 HCCs increased from 13% (95% CI 3–22%) to 22% (95% CI 17–27%). The proportions of stages 3 and 4 HCCs both declined, from 19% (95% CI 8–30%) to 12% (95% CI 8–16%) and from 23% (95% CI 11–36%) to 13% (95% CI 9–17%), respectively. Even with less favourable trends, however, AI/AN persons still had a higher proportion of stage 1 HCCs (35%; 95% CI 29–41%) and a lower proportion of stage 4 HCCs (13%; 95% CI 9–17%) than did NHB persons.

Stratification by sex found that API women had the largest increase in stage 1 HCC, from 21% (95% CI 16–25%) to 45% (95% CI 41–48%), whereas the greatest decrease in stage 4 HCC, from 29% (95% CI 19–39%) to 18% (95% CI 14–22%), was observed among NHB women. No reduction in stage 4 HCC was observed among NHB or API men.

The Joinpoint regression analyses found that HCC incidence rates significantly declined between 2015 and 2019 (APC -4.6%) (Table S1). The decline occurred in both sexes, but the decrease was greater among men (APC<sub>2015–2019</sub> -5.4%) than among women (APC<sub>2013–2019</sub> -2.8%). Significant declines in incidence rates were observed among API (APC<sub>2010–2019</sub> -4.6%), Hispanic (APC<sub>2012–2019</sub> -2.9%), and NHW individuals (APC<sub>2013–2019</sub> -2.7%). Although a slight decline (APC<sub>2009–2019</sub> -1.0%) was observed among NHB persons, the result was not statistically significant. In contrast to the trends among the other groups, rates among AI/AN persons significantly increased (APC<sub>1992–2019</sub> 4.0%). In 2019, HCC incidence rates were highest in AI/AN persons (ASR 12.12), followed by Hispanic persons (ASR 9.33).

### Discussion

Our findings, using the new SEER staging-over-time variable, are consistent with some, but not all, prior analyses of racial/ethnic differences in SEER data. For example, a previous study in which HCC stage was categorised as local, regional, distant, and unstaged did not examine trends over time, but it did report that

NHB persons had the highest proportion of distant-stage HCC during the period 2000–2015.<sup>7</sup> The finding of NHB persons being less likely than other groups to have early-stage disease has been replicated in a number of other studies, as reported by a recent meta-analysis.<sup>8</sup> In contrast, a study that used SEER data to examine HCC stage between 2004 and 2019 reported that although local-stage HCC significantly declined in all groups, distant-stage HCC increased among NHW persons between 2014 and 2019.<sup>5</sup> This finding could differ from that of the current study owing to less precise stage data than are available in the new staging-over-time variable.

Although the current study found favourable HCC stage trends among most groups, differences in stage among the groups were evident. These differences could be related to

disparities in surveillance. A recent study reported that NHB persons were less likely than other groups to be screened for HCC, whereas persons with HBV infection were more likely to be screened.<sup>9</sup> As HBV has been a dominant risk factor among API persons, screening in this group may be substantially more likely.<sup>10</sup>

In conclusion, although favourable trends in HCC stage were seen for many racial/ethnic groups, differences in the stage distribution of HCC were apparent. Particular attention should be paid to rectifying the lower proportion of stage 1 disease and higher proportion of stage 4 disease among NHB persons and the less favourable trends in stage seen among AI/AN persons. Efforts to reduce the HCC burden among all segments of the American population are clearly warranted.

### Abbreviations

A/PI, Asian/Pacific Islander; AI/AN, American Indian/Alaska Native; APC, annual percent change; ASR, age-standardised incidence rate; HCC, hepatocellular carcinoma; NHB, non-Hispanic Black; NHW, non-Hispanic White; SEER, Surveillance, Epidemiology and End Results.

### Financial support

This study was supported by the NIH Intramural Research Program.

### Conflicts of Interest

None of the authors have any conflicts of interest.

Please refer to the accompanying ICMJE disclosure forms for further details.

### Authors' contributions

Conception: KAM. Data analysis: CSA. Data acquisition: JR. Data manipulation: GF. Supervision: BIG, KAM. Writing of the manuscript: CSA. Editing of the manuscript: CSA. Reading of the manuscript: GF. Reviewing of the manuscript: JR, GF, BIG, KAM.

### Data availability statement

Data used in this study are publicly available at [www.seer.cancer.gov](http://www.seer.cancer.gov). SEER\*Stat Database: Incidence – SEER Research Data, 12 Registries, Nov 2021 Sub (1992–2019).

### Supplementary data

Supplementary data to this article can be found online at <https://doi.org/10.1016/j.jhepr.2023.100868>.

### References

*Author names in bold designate shared co-first authorship*

[1] Ajayi F, Jan J, Singal AG, Rich NE. Racial and sex disparities in hepatocellular carcinoma in the USA. *Curr Hepatol Rep* 2020;19:462–469.

[2] Alvarez CS, Petrick JL, Parisi D, McMahon BJ, Graubard BI, McGlynn KA. Racial/ethnic disparities in hepatocellular carcinoma incidence and mortality rates in the United States, 1992–2018. *Hepatology* 2022;76:589–598.

[3] Petrick JL, Florio AA, Loomba R, McGlynn KA. Have incidence rates of liver cancer peaked in the United States? *Cancer* 2020;126:3151–3155.

[4] Shi H, Huang J, Zhao S, Jin Y, Cai R, Ran J. Trends and disparities in stage-specific incidence of hepatocellular carcinoma among US adults. *Liver Cancer* 2004–2019;202(12):277–280.

[5] Surveillance, Epidemiology, and End results (SEER) program ([www.seer.cancer.gov](http://www.seer.cancer.gov)) SEER\*Stat database: incidence – SEER Research data, 12 registries, Nov 2021 Sub (1992–2019) – linked to county attributes – time dependent (1990–2019) income/rurality, 1969–2020 counties, National Cancer Institute, DCCPS, Surveillance Research Program, released April 2022, based on the November 2021 submission.

[6] Amin MB, Edge SB, Greene FL, Byrd DR, Brookland RK, Washington MK, et al. *AJCC cancer staging manual*. 8th ed. New York: Springer; 2017.

[7] Flores YN, Datta GD, Yang L, Corona E, Devineni D, Glenn BA, et al. Disparities in hepatocellular carcinoma incidence, stage, and survival: a large population-based study. *Cancer Epidemiol Biomarkers Prev* 2021;30:1193–1199.

[8] Rich NE, Carr C, Yopp AC, Marrero JA, Singal AG. Racial and ethnic disparities in survival among patients with hepatocellular carcinoma in the United States: a systematic review and meta-analysis. *Clin Gastroenterol Hepatol* 2022;20:e267–e288.

[9] Parikh ND, Tayob N, Al-Jarrah T, Kramer J, Melcher J, Smith D, et al. Barriers to surveillance for hepatocellular carcinoma in a multicenter cohort. *JAMA Netw Open* 2022;5:e2223504.

[10] Makarova-Rusher O, Altekruse SF, McNeel TS, Ulahannan S, Duffy AG, Graubard BI, et al. Population attributable fractions of risk factors for hepatocellular carcinoma in the United States. *Cancer* 2016;122:1757–1765.

**Journal of Hepatology, Volume 5**

**Supplemental information**

**Trends in hepatocellular carcinoma stage by racial/ethnic group in the United States, 1992–2019**

**Christian S. Alvarez, Jennifer Ruhl, Gretchen Flynn, Barry I. Graubard, and Katherine A. McGlynn**

# Trends in hepatocellular carcinoma stage by racial-ethnic group in the United States, 1992-2019

Christian S. Alvarez, Jennifer Ruhl, Gretchen Flynn, Barry I. Graubard, Katherine A.  
McGlynn

|               |   |
|---------------|---|
| Fig. S1.....  | 2 |
| Table S1..... | 3 |

**Supplementary Figure 1: Stage 1 vs Stage 4 HCC Trends By Racial-Ethnic Group in the U.S., 1992-2019**

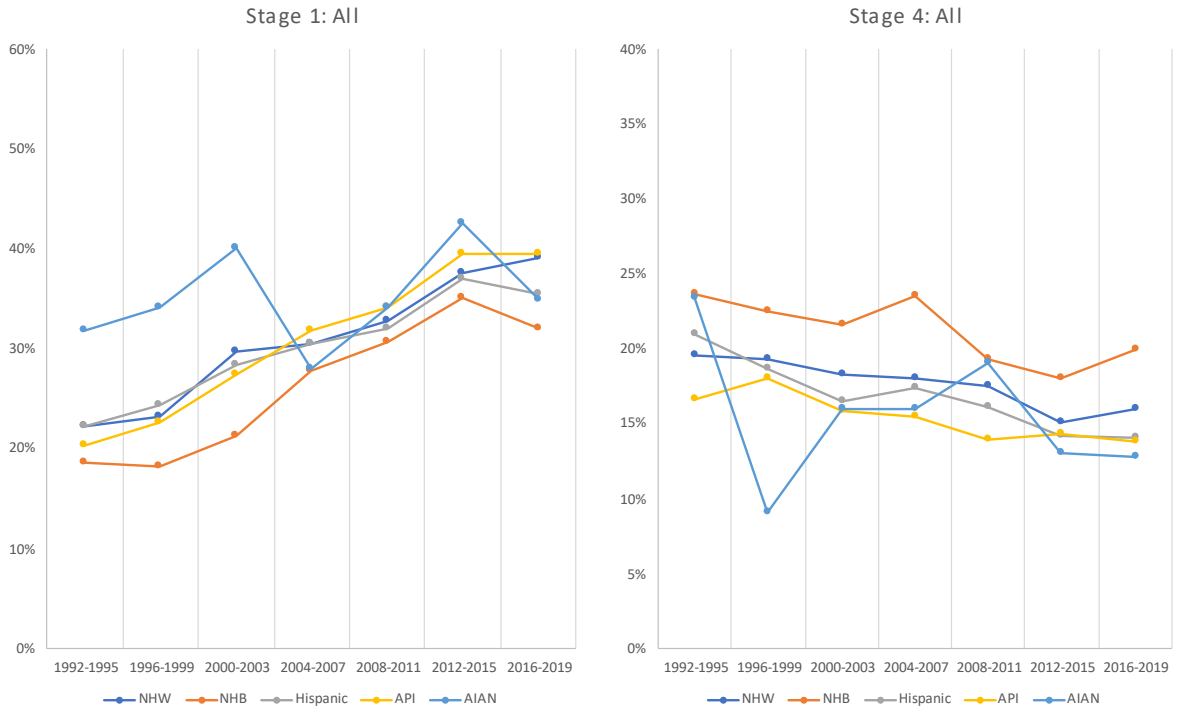

Abbreviations: NonHispanic White (NHW); Non-Hispanic Black (NHB); Asian/Pacific Islander (API); American Indian/Alaska Native (AI/AN)



**Supplementary Table 1.** Age-standardized rates and 95% CIs of hepatocellular carcinomas in the U.S.: SEER 12 registries, 1992 through 2019

|                               | 1992  |       |               | 2019  |       |               | Joinpoints |      |      | APC (%) Trends <sup>a</sup> |       |       |       | AAPC  |              |
|-------------------------------|-------|-------|---------------|-------|-------|---------------|------------|------|------|-----------------------------|-------|-------|-------|-------|--------------|
|                               | Cases | ASR   | 95%CI         | Cases | ASR   | 95%CI         | 1          | 2    | 3    | 1                           | 2     | 3     | 4     | %     | 95% CI       |
| All                           | 849   | 3.08  | (2.87, 3.29)  | 2,972 | 6.04  | (5.82, 6.26)  | 2009       | 2015 | -    | 4.7*                        | 0.9   | -4.6* | -     | 2.4*  | (1.9, 2.9)   |
| Sex                           |       |       |               |       |       |               |            |      |      |                             |       |       |       |       |              |
| Men                           | 614   | 5.03  | (4.63, 5.45)  | 2,190 | 9.53  | (9.12, 9.95)  | 2011       | 2016 | -    | 4.4*                        | -1.0  | -5.4* | -     | 2.3*  | (1.7, 2.8)   |
| Women                         | 235   | 1.53  | (1.34, 1.74)  | 782   | 3.00  | (2.79, 3.23)  | 2013       | -    | -    | 3.6*                        | -2.8* | -     | -     | 2.1*  | (1.5, 2.8)   |
| Race-ethnicity <sup>b</sup>   |       |       |               |       |       |               |            |      |      |                             |       |       |       |       |              |
| Non-Hispanic White            | 389   | 1.89  | (1.71, 2.09)  | 1,276 | 4.26  | (4.02, 4.51)  | 2004       | 2008 | 2013 | 4.2*                        | 7.4*  | 3.4*  | -2.7* | 2.9*  | (2.1, 3.7)   |
| Non-Hispanic Black            | 69    | 3.81  | (2.94, 4.84)  | 294   | 7.31  | (6.47, 8.22)  | 2009       | -    | -    | 5.4*                        | -1.0  | -     | -     | 3.0*  | (2.1, 3.9)   |
| Hispanic                      | 124   | 4.87  | (4.01, 5.85)  | 721   | 9.33  | (8.64, 10.07) | 2012       | -    | -    | 4.1*                        | -2.9* | -     | -     | 2.3*  | (1.7, 2.8)   |
| Asian/Pacific Islander        | 260   | 10.94 | (9.60, 12.41) | 601   | 8.18  | (7.53, 8.87)  | 2010       | -    | -    | -                           | 1.0*  | -4.6* | -     | -0.9* | (-1.5, -0.3) |
| American Indian/Alaska Native | 6     | 3.26  | (1.03, 7.25)  | 61    | 12.12 | (9.17, 15.72) | -          | -    | -    | 4.0*                        | -     | -     | -     | 4.0*  | (2.6, 5.3)   |

Abbreviations: 95% CI, 95% confidence interval; AAPC, average annual percent change; APC, annual percent change; ASR, age-standardized incidence rate; SEER, Surveillance, Epidemiology and End Results.

<sup>a</sup>Asterisk denotes that the trend was statistically different from zero at alpha 0.05 level.

<sup>b</sup>Cases may not add up to total due to unknown race-ethnicity categories.
